# Supplementary material for: Expert survey on coverage and characteristics of pediatric palliative care in Europe – a focus on home care
Source: PubMed Central journal article supplement (PMC9575204; doi:10.1186/s12904-022-01078-0), 2022-10-17
Supplement: 12904_2022_1078_MOESM3_ESM.pdf [file 12904_2022_1078_MOESM3_ESM.pdf]

**Supplemental Material 3.** Specialized pediatric palliative home care team composition.

| physicians               | nurses | psychologists | social worker | volunteers | grief counselor | spiritual support | others | n (%)    |
|--------------------------|--------|---------------|---------------|------------|-----------------|-------------------|--------|----------|
| no multi-professionalism |        |               |               |            |                 |                   |        |          |
|                          |        |               |               |            |                 |                   |        | 1 (25)   |
|                          |        |               |               |            |                 |                   |        | 1 (25)   |
|                          |        |               |               |            |                 |                   |        | 2 (50)   |
|                          |        |               |               |            |                 |                   |        | 4 (100)  |
| multi-professionalism    |        |               |               |            |                 |                   |        |          |
|                          |        |               |               |            |                 |                   |        | 5 (29.4) |
|                          |        |               |               |            |                 |                   |        | 3 (17.6) |
|                          |        |               |               |            |                 |                   |        | 2 (11.8) |
|                          |        |               |               |            |                 |                   |        | 1 (5.3)  |
|                          |        |               |               |            |                 |                   |        | 1 (5.3)  |
|                          |        |               |               |            |                 |                   |        | 1 (5.3)  |
|                          |        |               |               |            |                 |                   |        | 1 (5.3)  |
|                          |        |               |               |            |                 |                   |        | 1 (5.3)  |
|                          |        |               |               |            |                 |                   |        | 1 (5.3)  |
|                          |        |               |               |            |                 |                   |        | 17 (100) |

\*Only those 21 countries are listed where the corresponding professions are available in all national specialized pediatric palliative home care teams.
